# Supplementary material for: Signs of innate immune activation and premature immunosenescence in psoriasis patients
Source: PubMed Central journal article supplement (PMC5548718; doi:10.1038/s41598-017-07975-2), 2017-08-08

## **SUPPLEMENTARY MATERIAL**

### **Signs of innate immune activation and premature immunosenescence in psoriasis**

#### **patients**

Liisi Šahmatova<sup>1, 2#</sup>, Elena Sügis<sup>3, 4#</sup>, Marina Šunina<sup>5#</sup>, Helen Hermann<sup>5</sup>, Ele Prans<sup>5</sup>, Maire Pihlap<sup>5</sup>, Kristi Abram<sup>2</sup>, Ana Rebane<sup>5</sup>, Hedi Peterson<sup>3, 4</sup>, Pärt Peterson<sup>5</sup>, Külli Kingo<sup>1, 2</sup>, Kai Kisand<sup>5\*</sup>

<sup>1</sup> Department of Dermatology, University of Tartu, Estonia

<sup>2</sup> Dermatology Clinic, Tartu University Hospital, Estonia

<sup>3</sup> Institute of Computer Science, University of Tartu, Estonia

<sup>4</sup> Quretec Ltd, Tartu, Estonia

<sup>5</sup> Institute of Biomedicine and Translational Medicine, University of Tartu, Estonia

<sup>#</sup>These authors contributed equally to this work

**SUPPLEMENTARY TABLES**

**Table S1. Gene expression data and group comparisons for skin biopsy samples**

| Gene name | C Median<br>(Q1-Q3)         | L Median<br>(Q1-Q3)    | NL Median<br>(Q1-Q3)      | logFC<br>LvsC | P LvsC   | logFC<br>NLvsC | P NLvsC  | logFC<br>LvsNL | P LvsNL  | N <sub>C</sub> | N <sub>L</sub> | N <sub>NL</sub> |
|-----------|-----------------------------|------------------------|---------------------------|---------------|----------|----------------|----------|----------------|----------|----------------|----------------|-----------------|
| AIM2      | 2.93<br>(2.2-5.1)           | 9.39<br>(5.09-14.73)   | 3.91<br>(3.2-4.7)         | 1.67          | 8.27E-06 | 0.25           | 5.58E-01 | 1.42           | 1.83E-05 | 22             | 30             | 23              |
| CASP1     | 23.91<br>(18.84-31.89)      | 25.55<br>(18.01-28.55) | 20.2<br>(16.68-23.75)     | -0.04         | 8.36E-01 | -0.3           | 1.04E-01 | 0.26           | 1.24E-01 | 23             | 30             | 28              |
| CCL2      | 10.22<br>(7.95-14.8)        | 26.22<br>(19.48-35.03) | 13.18<br>(9.37-19.29)     | 1.26          | 2.75E-07 | 0.42           | 7.76E-02 | 0.84           | 2.65E-05 | 23             | 33             | 31              |
| CCL20     | 0.03<br>(0.03-0.05)         | 0.82<br>(0.5-1.27)     | 0.1<br>(0.04-0.21)        | 4.25          | 7.04E-15 | 1.53           | 2.24E-02 | 2.72           | 1.54E-07 | 17             | 31             | 27              |
| CCL27     | 158.98<br>(102.02-189.54)   | 33.21<br>(21.08-56.08) | 147.61<br>(109.77-206.19) | -2.12         | 9.63E-11 | 0              | 9.95E-01 | -2.12          | 1.12E-15 | 21             | 33             | 31              |
| CCL5      | 5.69<br>(4.51-7.41)         | 16.06<br>(6.12-27.72)  | 9.67<br>(6.84-13.03)      | 1.15          | 2.08E-04 | 0.76           | 1.26E-02 | 0.39           | 1.89E-01 | 23             | 33             | 31              |
| CTLA4     | 6.31<br>(3.02-7.12)         | 29.68<br>(15.15-95.26) | 11.2<br>(6.88-13.92)      | 3             | 3.26E-10 | 1.33           | 2.74E-03 | 1.67           | 1.35E-05 | 21             | 32             | 28              |
| CXCL1     | 0.00059<br>(0.00043-0.0015) | 0.02<br>(0.0088-0.03)  | 0.0013<br>(0.0007-0.0022) | 4.54          | 7.29E-16 | 0.91           | 4.92E-02 | 3.63           | 6.37E-14 | 20             | 32             | 27              |
| CXCL10    | 2.07<br>(1.04-3.29)         | 19.14<br>(13.11-25.97) | 5.39<br>(3.12-11.14)      | 3.14          | 8.75E-15 | 1.53           | 1.96E-03 | 1.62           | 2.32E-06 | 19             | 32             | 29              |
| CXCL2     | 0.0075                      | 0.03                   | 0.0097                    | 2.05          | 9.42E-09 | 0.32           | 5.32E-01 | 1.74           | 2.14E-08 | 18             | 31             | 25              |

|        |                                   |                         |                                    |       |          |       |          |       |          |    |    |    |
|--------|-----------------------------------|-------------------------|------------------------------------|-------|----------|-------|----------|-------|----------|----|----|----|
|        | (0.0042-0.01)                     | (0.02-0.04)             | (0.005-0.02)                       |       |          |       |          |       |          |    |    |    |
| CXCL8  | 0.0014<br>(0.00067-0.0027)        | 0.1<br>(0.06-0.3)       | 0.0017<br>(0.00088-0.0021)         | 6.56  | 5.77E-12 | 0.71  | 6.03E-01 | 5.85  | 4.92E-10 | 11 | 32 | 14 |
| DEFB1  | 34.58<br>(26.65-132.64)           | 23.11<br>(16.42-32.44)  | 26.26<br>(19.92-37.08)             | -1.15 | 6.38E-04 | -1.12 | 2.20E-02 | -0.04 | 8.88E-01 | 23 | 33 | 31 |
| EOMES  | 0.75<br>(0.6-2.19)                | 3.1<br>(1.71-4.83)      | 2.05<br>(1.83-4.35)                | 1.46  | 7.63E-04 | 1.27  | 3.66E-03 | 0.19  | 5.82E-01 | 15 | 31 | 27 |
| FOXP3  | 18.26<br>(8.08-22.56)             | 65.03<br>(33.56-115.13) | 16.7<br>(12.16-23.56)              | 2.04  | 5.72E-08 | 0.24  | 5.75E-01 | 1.81  | 6.29E-11 | 22 | 32 | 31 |
| IFIH1  | 7.58<br>(5.68-9.95)               | 16.82<br>(12.97-35.05)  | 11.63<br>(6.68-14.42)              | 1.28  | 1.22E-04 | 0.59  | 3.63E-02 | 0.69  | 3.65E-02 | 23 | 32 | 29 |
| IFNAR1 | 1.1<br>(0.7-1.29)                 | 0.84<br>(0.55-1.12)     | 0.92<br>(0.75-1.1)                 | -0.3  | 2.47E-01 | -0.08 | 7.63E-01 | -0.21 | 2.45E-01 | 23 | 33 | 31 |
| IFNGR  | 0.86<br>(0.54-1.07)               | 1.24<br>(0.92-1.87)     | 0.82<br>(0.71-1.12)                | 0.64  | 1.50E-02 | 0.2   | 5.11E-01 | 0.44  | 2.87E-02 | 23 | 33 | 31 |
| IL10   | 0.33<br>(0.24-0.45)               | 1.06<br>(0.72-1.74)     | 0.69<br>(0.5-0.86)                 | 1.86  | 9.56E-07 | 1.03  | 1.81E-03 | 0.83  | 2.20E-03 | 21 | 25 | 26 |
| IL17A  | 0.000018<br>(0.0000014-0.0000023) | 0.58<br>(0.34-0.78)     | 0.0000027<br>(0.0000017-0.0000034) | 17.17 | 2.26E-28 | 1.05  | 5.91E-01 | 16.12 | 6.99E-24 | 18 | 31 | 20 |
| IL17F  | 0.006<br>(0.0043-0.0087)          | 1.76<br>(0.75-2.99)     | 0.01<br>(0.0068-0.02)              | 8.09  | 5.52E-27 | 1.35  | 3.82E-02 | 6.74  | 4.92E-20 | 16 | 27 | 24 |
| IL1B   | 0.11<br>(0.04-0.27)               | 0.62<br>(0.45-1.43)     | 0.07<br>(0.05-0.12)                | 2.5   | 1.61E-05 | -0.46 | 5.58E-01 | 2.96  | 2.20E-08 | 19 | 30 | 25 |
| IL36   | 46.76                             | 2250.97                 | 118.19                             | 5.79  | 4.41E-28 | 1.9   | 1.71E-05 | 3.90  | 2.21E-20 | 23 | 33 | 31 |

|         |                             |                          |                          |       |          |      |          |       |          |    |    |    |
|---------|-----------------------------|--------------------------|--------------------------|-------|----------|------|----------|-------|----------|----|----|----|
|         | (25.29-59.53)               | (1615.39-2704.23)        | (70.77-175.2)            |       |          |      |          |       |          |    |    |    |
| IL1RN   | 41.07<br>(23.5-53.81)       | 107.98<br>(87.06-149.15) | 60.49<br>(51.95-73.47)   | 1.74  | 6.03E-09 | 0.93 | 4.80E-04 | 0.80  | 8.02E-05 | 23 | 33 | 31 |
| IL20RA  | 9.15<br>(5.43-12.37)        | 5.64<br>(3.84-8.93)      | 6.92<br>(5.1-9.02)       | -0.22 | 6.41E-01 | 0.18 | 7.63E-01 | -0.40 | 1.16E-01 | 23 | 29 | 31 |
| IL22    | 0.00084<br>(0.00071-0.0014) | 10<br>(4.42-16.59)       | 0.0063<br>(0.004-0.0083) | 13.01 | 8.53E-32 | 3.19 | 2.69E-04 | 9.81  | 1.68E-20 | 17 | 23 | 22 |
| IL22RA1 | 11.16<br>(4.31-12.76)       | 21.51<br>(13.96-26.81)   | 13.34<br>(11.27-16.4)    | 1.7   | 1.11E-05 | 1.06 | 9.25E-03 | 0.64  | 4.60E-04 | 23 | 32 | 31 |
| IL22RA2 | 15.49<br>(4.39-25.85)       | 26.34<br>(18.38-38.3)    | 12.35<br>(7.52-26.56)    | 0.95  | 3.61E-02 | 0.22 | 7.63E-01 | 0.73  | 7.36E-02 | 17 | 25 | 18 |
| IL26    | 1.21<br>(0.81-1.82)         | 8.59<br>(4.29-15.98)     | 1.36<br>(0.72-2.77)      | 2.77  | 1.01E-04 | 0.42 | 7.56E-01 | 2.36  | 2.73E-04 | 5  | 22 | 8  |
| INFG    | 44.3<br>(29.84-78.76)       | 371.27<br>(297.69-563)   | 60.69<br>(38.89-73.03)   | 3.17  | 3.56E-08 | 0.25 | 5.91E-01 | 2.92  | 1.40E-09 | 17 | 13 | 19 |
| KLRK1   | 24.43<br>(18.73-37.3)       | 33.17<br>(17.43-44.29)   | 30.43<br>(23.5-47.92)    | 0.06  | 8.50E-01 | 0.37 | 3.00E-01 | -0.31 | 3.05E-01 | 22 | 30 | 28 |
| LCN2    | 0.0048<br>(0.0024-0.0086)   | 0.19<br>(0.13-0.28)      | 0.0092<br>(0.004-0.03)   | 4.95  | 6.76E-16 | 1.09 | 1.27E-01 | 3.86  | 1.25E-07 | 22 | 27 | 16 |
| MICB    | 0.12<br>(0.05-0.15)         | 0.18<br>(0.12-0.22)      | 0.14<br>(0.11-0.17)      | 0.96  | 1.35E-02 | 0.83 | 9.25E-03 | 0.13  | 6.57E-01 | 23 | 33 | 30 |
| NLRP1   | 13.39<br>(7.47-15.33)       | 8.06<br>(5.49-10.88)     | 13.16<br>(9.98-15.45)    | -0.36 | 1.97E-01 | 0.2  | 5.32E-01 | -0.56 | 1.76E-02 | 23 | 30 | 30 |

|        |                          |                            |                          |       |          |       |          |       |          |    |    |    |
|--------|--------------------------|----------------------------|--------------------------|-------|----------|-------|----------|-------|----------|----|----|----|
| NLRP3  | 2.64<br>(1.57-3.48)      | 2.91<br>(1.7-4.32)         | 1.95<br>(1.1-3.37)       | 0.24  | 6.41E-01 | -0.19 | 7.63E-01 | 0.43  | 3.02E-01 | 11 | 18 | 17 |
| PI3    | 0.14<br>(0.05-0.25)      | 75.13<br>(58.46-102.04)    | 0.23<br>(0.09-0.42)      | 9.08  | 8.53E-32 | 1.34  | 7.76E-02 | 7.74  | 1.18E-21 | 23 | 33 | 31 |
| PYCARD | 33.4<br>(28.4-56.46)     | 64.04<br>(56.81-96.65)     | 38.55<br>(29.33-43.64)   | 0.93  | 1.11E-05 | 0.03  | 8.83E-01 | 0.90  | 1.64E-06 | 23 | 33 | 29 |
| REG3A  | 106.74<br>(86.43-145.22) | 38.49<br>(21.66-74.32)     | 100.36<br>(85.91-117.23) | -1.53 | 2.93E-02 | 0.16  | 8.10E-01 | -1.70 | 4.01E-02 | 7  | 8  | 7  |
| S100A8 | 6.51<br>(1.78-25.07)     | 939.45<br>(731.64-1092.69) | 8.09<br>(1.93-14.17)     | 6.99  | 1.37E-21 | 0.27  | 7.87E-01 | 6.72  | 2.22E-20 | 23 | 33 | 31 |
| S100A9 | 2.74<br>(1.42-13.32)     | 1532.5<br>(936.2-1669.27)  | 8.76<br>(2.62-23.96)     | 8.29  | 6.67E-27 | 1.26  | 1.96E-01 | 7.03  | 7.82E-19 | 23 | 33 | 30 |
| TNF    | 14.45<br>(6.36-17.85)    | 24.3<br>(16.1-32.37)       | 18.16<br>(13.49-21.75)   | 1.14  | 1.22E-04 | 0.84  | 9.70E-03 | 0.29  | 1.38E-01 | 23 | 32 | 31 |
| TRGC1  | 46.74<br>(28.9-60.13)    | 58.79<br>(45.63-128.56)    | 40.5<br>(30.4-66.04)     | 0.51  | 2.27E-01 | -0.08 | 8.47E-01 | 0.58  | 1.58E-01 | 20 | 29 | 26 |
| WIPI1  | 24<br>(21.71-37.89)      | 24.96<br>(19.36-27.96)     | 24.39<br>(20.05-29.83)   | -0.26 | 1.85E-01 | -0.17 | 4.22E-01 | -0.09 | 5.55E-01 | 23 | 33 | 31 |

C - control skin, L - lesional skin, NL - nonlesional skin, FC - fold change, N<sub>C</sub>—number of control samples, N<sub>L</sub>—number of lesional skin samples, N<sub>NL</sub>—number of nonlesional skin samples

**Table S2. The percentages and mean fluorescence indexes of key T cell subpopulations and cell surface markers as studied with flow cytometry**

| Cell subset                                        | Psoriasis patients                                |             | Healthy controls |             | P-value |
|----------------------------------------------------|---------------------------------------------------|-------------|------------------|-------------|---------|
|                                                    | % of cell subset within corresponding lymphocytes |             |                  |             |         |
|                                                    | Mean                                              | Range       | Mean             | Range       |         |
| CD4+ T cells (within CD3+ T cells)                 | 56.7                                              | 41.3 – 73.1 | 64.5             | 45.3 – 78.2 | ns      |
| Naive CD4+ T cells (within CD4+ T cells)           | 46.9                                              | 33.3 – 69.6 | 50.1             | 24.4 - 68.4 | ns      |
| RTE (CD31+ naive CD4+ T cells within CD4+ cells)   | 27.6                                              | 13.8 – 53.5 | 30.2             | 14.2 – 53.9 | ns      |
| CM CD4+ T cells (within CD4+ T cells)              | 37.2                                              | 15.0 – 50.4 | 33.3             | 19.4 – 52.0 | ns      |
| EM CD4+ T cells (within CD4+ T cells)              | 14.2                                              | 3.8 – 23.7  | 13.8             | 8.3 – 24.4  | ns      |
| CD4+ T <sub>EMRA</sub> (within CD4+ T cells)       | 1.7                                               | 0.1 – 7.0   | 2.8              | 0.3 – 16.6  | ns      |
| HLA-DR+ CD4+ T cells (within CD4+ T cells)         | 1.2                                               | 0.6 – 2.4   | 0.7              | 0.3 – 1.3   | ns      |
| CD8+ T cells (within CD3+ T cells)                 | 36.7                                              | 21.1 – 51.1 | 26.3             | 9.7 – 45.7  | 0.0347  |
| Naive CD8+ T cells (within CD8+ T cells)           | 34.4                                              | 10.9 – 70.9 | 36.6             | 14.4 – 62.3 | ns      |
| RTE (CD31+ naive CD8+ T cells within CD8+ cells)   | 31.1                                              | 7.2 – 68.3  | 34.5             | 12.7 – 60.6 | ns      |
| CM CD8+ T cells (within CD8+ T cells)              | 7.5                                               | 0.9 – 17.0  | 10.2             | 4.0 – 18.5  | ns      |
| EM CD8+ T cells (within CD8+ T cells)              | 31.6                                              | 16.0 – 48.1 | 40.6             | 18.4 – 63.5 | ns      |
| CD8+ T <sub>EMRA</sub> (within CD8+ T cells)       | 26.5                                              | 3.8 – 55.8  | 12.7             | 3.7 – 36.7  | 0.0443  |
| CD28- CD8+ T <sub>EMRA</sub> (within CD8+ T cells) | 23.0                                              | 2.6 – 53.7  | 11.1             | 1.9 – 35.8  | 0.0443  |
| Tregs (CD25+CD127-) (within CD3+ T cells)          | 3.0                                               | 0.9 – 4.9   | 2.5              | 1.3 – 3.5   | ns      |
| HLA-DR+ Tregs (within Tregs)                       | 14.0                                              | 4.5 – 22.9  | 8.7              | 4.9 – 16.0  | 0.0347  |
| HLA-DR+ CD4+ T cells                               | 1.2                                               | 0.6 – 2.4   | 0.7              | 0.3 – 1.3   | ns      |

| (within CD4+ T cells)          |                                        |              |      |             |        |
|--------------------------------|----------------------------------------|--------------|------|-------------|--------|
|                                | MFI of corresponding lymphocyte subset |              |      |             |        |
|                                | Mean                                   | Range        | Mean | Range       |        |
| Treg CM HLA-DR MFI             | 255                                    | 165 – 358    | 183  | 135 – 264   | 0.0291 |
| Naive CD8+ T cells CLA MFI     | 241                                    | 137 – 651    | 226  | 164 – 330   | ns     |
| CM CD8+ T cells CLA MFI        | 4572                                   | 2796 – 11154 | 4008 | 2258 – 6012 | ns     |
| EM CD8+ T cells CLA MFI        | 3772                                   | 1623 – 5581  | 2250 | 1342 – 4747 | 0.0443 |
| CD8+ T <sub>EMRA</sub> CLA MFI | 750                                    | 178 – 2837   | 658  | 302 – 2053  | ns     |

CLA – cutaneous leukocyte antigen, CM – central memory, EF – effector memory, MFI – median fluorescence intensity, RTE – recent thymic emigrant, T<sub>EMRA</sub> – effector memory T cell with CD45RA expression

### Table S3. Characteristics of participants.

Psoriasis patients were collected from the outpatient or inpatient department of the Dermatology Clinic. None of the patients had received any treatment for their psoriasis for at least a month before recruitment. Control subjects were recruited from among healthcare personnel, medical students and patients who turned to the dermatological outpatient clinic for surgical excision of nevus. None of the control subjects had any chronic skin disease history or psoriasis in their family.

| Characteristic                                                                  | Psoriasis patients         | Control subjects |
|---------------------------------------------------------------------------------|----------------------------|------------------|
| Total number of participants                                                    | 33 (41) <sup>#</sup>       | 23               |
| Number of males/females                                                         | 25/10 (31/10) <sup>#</sup> | 8/16             |
| Age range (years)                                                               | 20-63                      | 24-57            |
| PASI score range                                                                | 2-44                       |                  |
| Number of patients with psoriasis arthritis                                     | 10 (12)                    |                  |
| Number of patients with nail involvement                                        | 27 (31)                    |                  |
| Number of patients with early onset psoriasis/late onset psoriasis <sup>*</sup> | 29/6 (33/6)                |                  |
| Positive family history of psoriasis                                            | 19                         |                  |

<sup>\*</sup>Early onset psoriasis is defined as a disease with onset before the age of 40 years and late onset psoriasis is defined as a disease with onset at or after the age of 40 years

<sup>#</sup> in brackets the total number of recruited patients is shown, the number before the brackets stands for patients with two parallel skin biopsy specimens analysed.

**Table S4. Primer sequences.**

| <b>Gene</b>                                           | <b>Forward primer</b>    | <b>Reverse primer</b>    |
|-------------------------------------------------------|--------------------------|--------------------------|
| ACTB – actin beta                                     | CTGGAACGGTGAAGGTGACA     | CGGCCACATTGTGAACTTTG     |
| AIM2 – absent in melanoma 2                           | TAAGTCAAGCTGAAATGAGTCCTG | TTCTG TTCAGGCTTAACATGAGG |
| CASP1 – caspase 1                                     | AAAGTCGGCAGAGATTTATCCA   | GATGTCAACCTCAGCTCCAG     |
| CCL2 – C-C motif chemokine ligand 2                   | AAGCTGTGATCTTCAAGACC     | GTTCAAGTCTTCGGAGTTTGG    |
| CCL5 - C-C motif chemokine ligand 5                   | CCATATTCCTCGGACACCAC     | TTTCGGGTGACAAAGACGAC     |
| CCL20 - C-C motif chemokine ligand 20                 | ATCAGAAGCAAGCAACTTTGAC   | TGATAGCATTGATGTCACAGCC   |
| CCL27 - C-C motif chemokine ligand 27                 | AGAGAAGGAAGAGTCTAGGCTG   | GTAGGAATGCTGCTGTAGGG     |
| CTLA4 – cytotoxic T-lymphocyte associated protein 4   | TGAACCTGGCTACCAGGACC     | CCACGTGCATTGCTTTGC       |
| CXCL1 – C-X-C motif chemokine ligand 1                | ATGCTGAACAGTGACAAATCC    | CTCAAACACATTAGGCACAATCC  |
| CXCL2 – C-X-C motif chemokine ligand 2                | CCAAACCGAAGTCATAGCCACAC  | GCCACCAATAAGCTTCCTCCT    |
| CXCL8 – C-X-C motif chemokine ligand 8                | GAGAGTGATTGAGAGTGGAC     | GAATTCTCAGCCCTCTTCAA     |
| CXCL10 – C-X-C motif chemokine ligand 10              | TTCCTGCAAGCCAATTTTGT     | TTCTTGATGGCCTTCGATTC     |
| EOMES - eomesodermin                                  | GACAACTATGATTCATCCCATCAG | GGCTTGAGGTAAAGTGTTGAC    |
| FOXP3 – forkhead box 3                                | TGGAGAAGGAGAAGCTGAGTGC   | CCCTTGTCGGATGATGCCA      |
| IFIH1 – interferon induced with helicase C domain 1   | ATGGAGCAATATACTAGGACTG   | TTGTTCAATTCTGTGTCATGG    |
| IFNAR1 - Interferon alpha and beta receptor subunit 1 | CCATCCAAAGCCCACATAACT    | CGCAAAGCTCAGATTGGTCCT    |



|                                                   |                          |                          |
|---------------------------------------------------|--------------------------|--------------------------|
| IFNG – interferon gamma                           | TTCGGTAACTGACTTGAATGTCCA | TTTCGCTTCCCTGTTTTAGCTG   |
| IFNGR – interferon gamma receptor 1               | GCTCGTCTCCATTTACAAAACTGA | GGAAAAATTGGACCACCTAAACTG |
| IL10 – interleukin 10                             | TTCCCAGGCAACCTGCCTAA     | TGTCCAGCTGATCCTTCATTTGA  |
| IL17A – interleukin 17A                           | ACCGCAATGAGGACCCTGAGA    | TCCACGTTCCCATCAGCGT      |
| IL17F – interleukin 17F                           | GGAATTACACTGTCACCTTGG    | GATGTCTTCCTTTCCTTGAG     |
| IL1B – interleukin 1 beta                         | AAACAGATGAAGTGCTCCTTCC   | CATCTTCCTCAGCTTGTCCA     |
| IL36A – interleukin 36, alpha                     | GCCGTCTATCAATCAATGTGTA   | ACTGTCACCTTCGTGGAACTG    |
| IL1RN – interleukin receptor antagonist           | AAGATAGATGTGGTACCCATTGAG | TGATGTAACTGCCTCCAGC      |
| IL20RA – interleukin 20 receptor subunit alpha    | GAACCTACTGTGATCTTTCTGCT  | GTGGGCCAATTTGTGTTTCTAA   |
| IL22 – interleukin 22                             | AGCACATGTCATATTGAAGG     | GTTCTCCAATTGCTTTGATCTC   |
| IL22RA1 – interleukin 22 receptor subunit alpha 1 | ATCGAGTATAAGACGTACGGAG   | CATAGTAGAGCTCCGTGAGG     |
| IL22RA2 - interleukin 22 receptor subunit alpha 2 | TGGTGTAGCAGGAACTCAGTC    | TGCTGTTGCCAGTAAGTGCC     |
| IL26 – interleukin 26                             | ATTTCAAGAACAGCTTCTGTCC   | AAGCACAGGAAATACAGTGG     |
| KLRK1 – killer cell lektin like receptor K1       | TATACAGCAAAGAGGACCAGGA   | TATTGTTAGTAGGTTGGGTGAGAG |
| LCN2 – lipocalin 2                                | GGCAACATTAAGAGTTACCCTGGA | GTTCTCCTTTAGTCCGAAGTCAG  |
| MICB – MHC class I polypeptide-related sequence B | CTATGACAGGCAGAAACGCA     | GAATGCAAGCCTCCTTTCTG     |
| NLRP1 – NLR family pyrin domain containing 1      | ACTTGTACCGAGTTCACCTTCC   | CTGTGCTGTGGGTTGATCTC     |
| NLRP3 - - NLR family pyrin domain containing 3    | ACATGCCCAAGGAGGAAGAG     | GGCTGTTACCAATCCATGAG     |
| PI3- peptidase inhibitor 3                        | TCACGGGAGTTCCTGTAAAGGTC  | CCTTGACTGGCTCTTGCGCT     |

|                                                          |                          |                          |
|----------------------------------------------------------|--------------------------|--------------------------|
| PYCARD – PYD and CARD domain containing                  | CTGGTCAGCTTCTACCTGGA     | CTATAAAGTGCAGGCCTGGC     |
| S100A8 – S100 calcium binding protein A8                 | GTCTTTCAGAAGACCTGGTG     | CGGTCTCTAGCAATTTCTTCAG   |
| S100A9 - S100 calcium binding protein A9                 | AACACCTTCCACCAATACTC     | TTCATTCTTATTCTCCTTCTTGAG |
| TNF – tumor necrosis factor                              | CCCATGTTGTAGCAAACCCT     | AGGACCTGGGAGTAGATGAG     |
| TRGC1 – T cell receptor gamma constant 1                 | GGACAAAGAACACAGATGTATCGT | GCAGCAGTAGTGTATCATTGCA   |
| WIPI1 – WD repeat domain, phosphoinositide interacting 1 | TTTCCTCCTATAATCTTGTGCCGT | ACTCCATTCTCCGCCTTCC      |

**Table S5. Used antibodies.**

| Antibody and dye                        | Manufacturer             | Clone    |
|-----------------------------------------|--------------------------|----------|
| APC-Cy7 Streptavidin                    | BioLegend                | -        |
| CD127 Biotin                            | eBioscience              | eBioRDR5 |
| CD197 (CCR7) PE-CF594                   | BD Biosciences           | 150503   |
| CD25 Brilliant Violet 711™              | BioLegend                | BC96     |
| CD28 PE-Cy5                             | BioLegend                | CD28.2   |
| CD3 PerCP-Cy5.5                         | BioLegend                | HIT3a    |
| CD31 APC                                | BioLegend                | WM59     |
| CD4 Alexa Fluor® 700                    | BioLegend                | OKT4     |
| CD45RA PE-Cy7                           | BioLegend                | HI100    |
| CD8a Brilliant Violet 605™              | BioLegend                | RPA-T8   |
| CLA FITC                                | BioLegend                | HECA-452 |
| HLA-DR Brilliant Violet 510™            | BioLegend                | L243     |
| LIVE/DEAD® Fixable Blue Dead Cell Stain | Thermo Fisher Scientific | -        |
| TIGIT PE                                | eBioscience              | MBSA43   |

**Table S6. Optical detectors configuration of flow cytometer.**

| <b>Laser</b>        | <b>PMT</b> | <b>LP Mirror</b> | <b>BP Filter</b> | <b>Intended Dye</b>   |
|---------------------|------------|------------------|------------------|-----------------------|
| 488-nm blue laser   | A          | 685              | 710/50           | PerCP-Cy5.5           |
|                     | B          | 505              | 530/30           | FITC                  |
|                     | C          |                  | 488/10           | Side scatter (SSC)    |
| 405-nm violet laser | A          | 670              | 710/40           | Brilliant Violet 711™ |
|                     | B          | 630              | 670/30           | -                     |
|                     | C          | 600              | 610/20           | Brilliant Violet 605™ |
|                     | D          | 535              | 540/30           | -                     |
|                     | E          | 505              | 525/50           | Brilliant Violet 510™ |
|                     | F          | -                | 440/40           | -                     |
| 561-nm YG laser     | A          | 750              | 780/60           | PE-Cy7                |
|                     | B          | 685              | 710/50           | -                     |
|                     | C          | 635              | 670/30           | PE-Cy5                |
|                     | D          | 600              | 610/20           | PE-CF594              |
|                     | E          | -                | 586/15           | PE                    |
| 355-nm UV laser     | A          | 505              | 530/30           | -                     |
|                     | B          | -                | 450/50           | LIVE/DEAD®            |
| 640-nm red laser    | A          | 750              | 780/60           | APC-Cy7               |
|                     | B          | 690              | 730/45           | Alexa Fluor® 700      |
|                     | C          | -                | 670/14           | APC                   |

**Table S7. Spillover matrix (values in %).**

|     | 1. FITC-A | 2. PerCP-Cy5-5-A | 3. Brilliant Violet 510-A | 4. Brilliant Violet 605-A | 5. Brilliant Violet 711-A | 6. LIVE/DEAD-A | 7. APC-A | 8. Alexa Fluor 700-A | 9. APC-Cy7-A | 10. PE-A | 11. PE-CF594-A | 12. PE-Cy5-A | 13. PE-Cy7-A |
|-----|-----------|------------------|---------------------------|---------------------------|---------------------------|----------------|----------|----------------------|--------------|----------|----------------|--------------|--------------|
| 1.  | 100       | 2                | 4                         | 1                         | 0                         | 0              | 0        | 0                    | 0            | 0        | 0              | 0            | 0            |
| 2.  | 0         | 100              | 0                         | 0                         | 50                        | 0              | 14       | 32                   | 6            | 0        | 0              | 16           | 6            |
| 3.  | 0         | 0                | 100                       | 46                        | 15                        | 1              | 0        | 0                    | 0            | 0        | 0              | 0            | 0            |
| 4.  | 0         | 3                | 1                         | 100                       | 40                        | 0              | 0        | 0                    | 0            | 34       | 58             | 14           | 2            |
| 5.  | 0         | 14               | 0                         | 0                         | 100                       | 0              | 2        | 50                   | 9            | 0        | 0              | 0            | 1            |
| 6.  | 1         | 0                | 2                         | 0                         | 0                         | 100            | 0        | 0                    | 0            | 0        | 0              | 0            | 0            |
| 7.  | 0         | 0                | 0                         | 0                         | 2                         | 0              | 100      | 35                   | 5            | 0        | 0              | 12           | 1            |
| 8.  | 0         | 2                | 0                         | 0                         | 4                         | 0              | 1        | 100                  | 15           | 0        | 0              | 0            | 2            |
| 9.  | 0         | 0                | 0                         | 0                         | 0                         | 0              | 9        | 17                   | 100          | 0        | 0              | 1            | 19           |
| 10. | 0         | 3                | 0                         | 1                         | 0                         | 0              | 0        | 0                    | 0            | 100      | 34             | 4            | 0            |
| 11. | 0         | 15               | 0                         | 3                         | 1                         | 0              | 0        | 0                    | 0            | 22       | 100            | 19           | 2            |
| 12. | 0         | 70               | 0                         | 0                         | 5                         | 0              | 81       | 32                   | 5            | 3        | 1              | 100          | 11           |
| 13. | 0         | 2                | 0                         | 0                         | 0                         | 0              | 0        | 1                    | 10           | 4        | 2              | 0            | 100          |

## SUPPLEMENTAL FIGURES

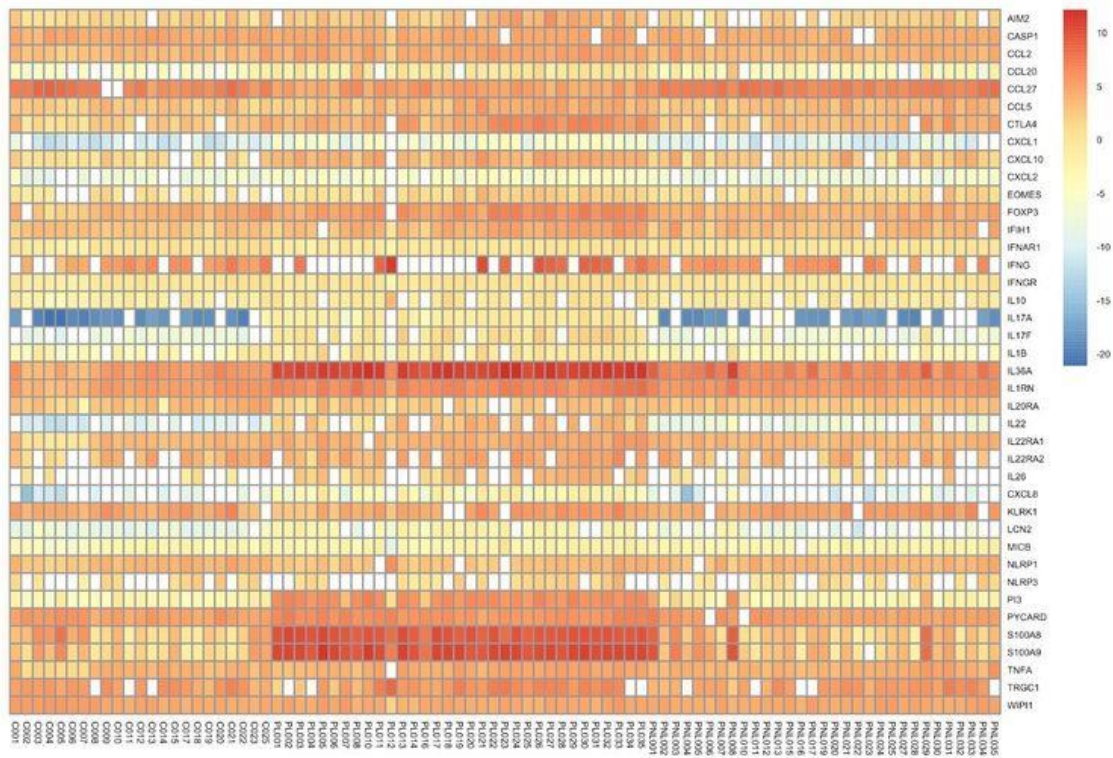

**Figure S1. Heatmap of log<sub>2</sub> transformed gene expression data.**

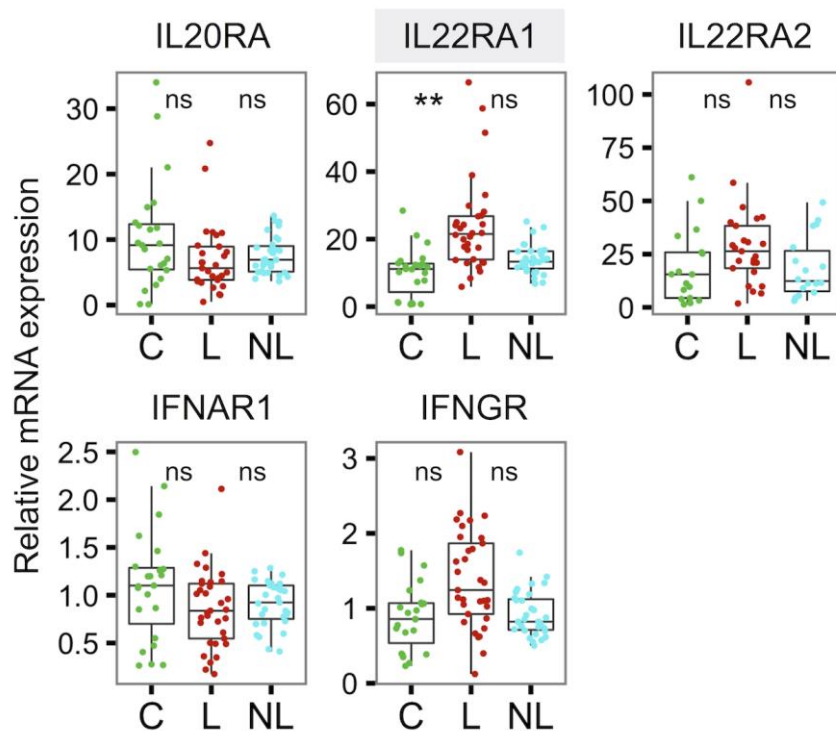

**Figure S2. Gene expression of several cytokine receptors in skin biopsy samples.** QRT-PCR was used to quantify the expression of the receptor genes in skin biopsy samples obtained from lesional (L) and nonlesional (NL) skin of psoriasis patients as well as from age-matched control subjects (C). The box-and-whisker plots depict median (central line), interquartile range (IQR, Q1-Q3, box),  $Q3 + 1.5 \times IQR$  (upper whisker) and  $Q1 - 1.5 \times IQR$  (lower whisker). Stars above the groups C and NL depict their significance level from L samples. \*\*  $P < 0.001$ . Gray shading behind the gene name indicates to statistically significant differences between NL and C biopsy samples (for IL22RA1  $P = 0.0092$ )

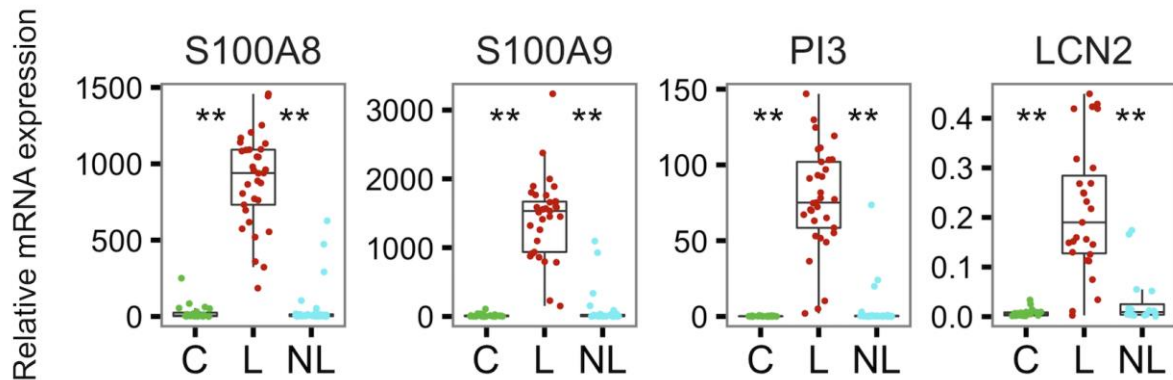

**Figure S3. Gene expression of several AMPs in skin biopsy samples.** QRT-PCR was used to quantify the expression of genes encoding several AMPs in skin biopsy samples obtained from lesional (L) and nonlesional (NL) skin of psoriasis patients as well as from age-matched control subjects (C). The box-and-whisker plots depict median (central line), interquartile range (IQR, Q1-Q3, box),  $Q3 + 1.5 \times IQR$  (upper whisker) and  $Q1 - 1.5 \times IQR$  (lower whisker). Stars above the groups C and NL depict their significance level from L samples. \*\*  $P < 0.001$ .

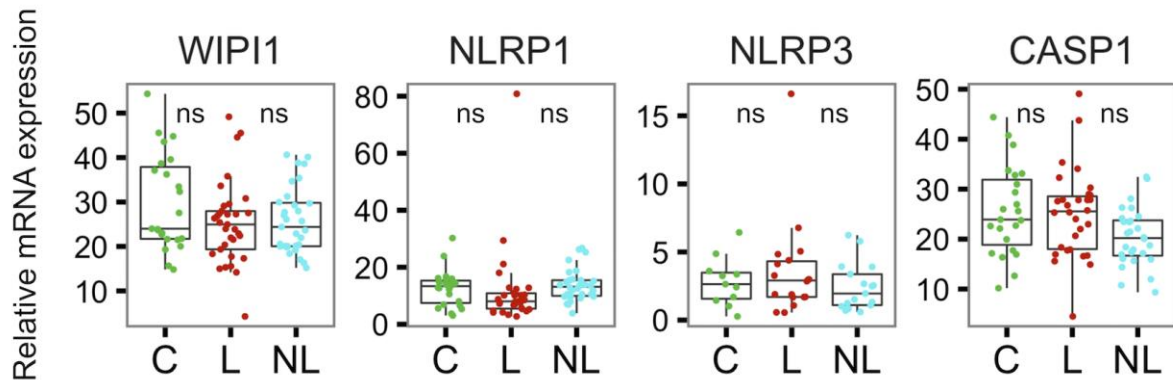

**Figure S4. Gene expression data of autophagy and inflammasome related genes in skin biopsy samples.** QRT-PCR was used to quantify the expression of selected genes in skin biopsy samples obtained from lesional (L) and nonlesional (NL) skin of psoriasis patients as well as from age-matched control individuals (C). The box-and-whisker plots depict median (central line), interquartile range (IQR, Q1-Q3, box),  $Q3 + 1.5 \times IQR$  (upper whisker) and  $Q1 - 1.5 \times IQR$  (lower whisker).



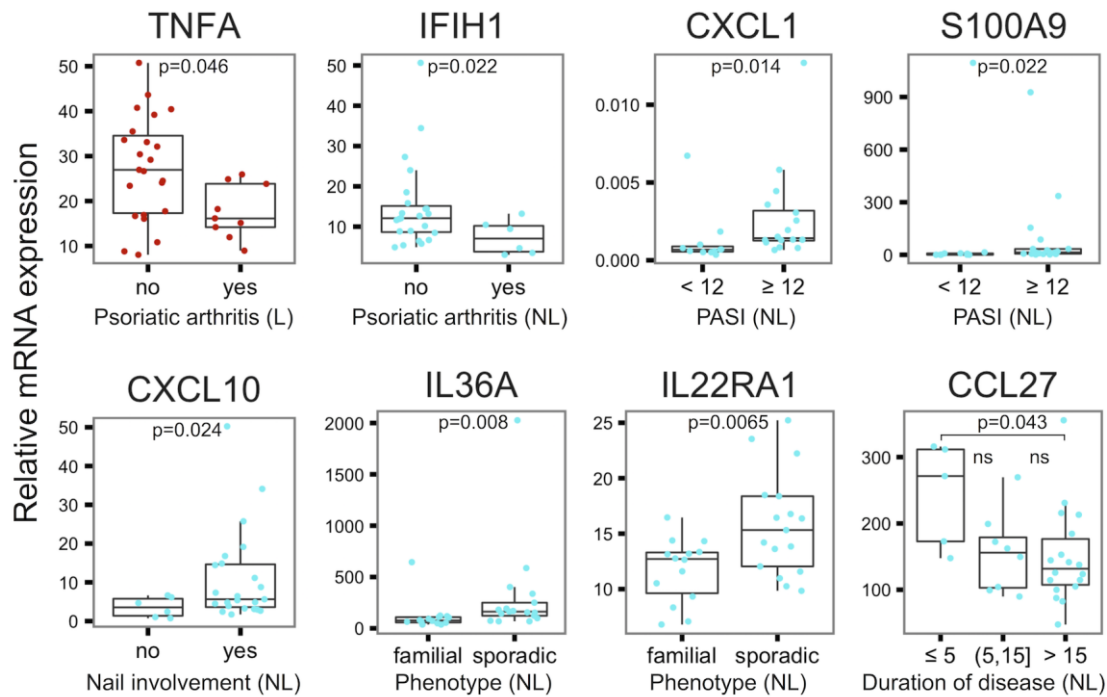

**Figure S5. Gene expression data in skin biopsy samples derived from psoriasis patients with different phenotypic features.** Red dots represent samples from psoriatic lesions (L) and blue dots samples from non-lesional (NL) skin of psoriasis patients. The box-and-whisker plots depict median (central line), interquartile range (IQR, Q1-Q3, box),  $Q3 + 1.5 \times IQR$  (upper whisker) and  $Q1 - 1.5 \times IQR$  (lower whisker).

**Figure S6. Gating strategy for T cell subpopulations in PBMC samples**

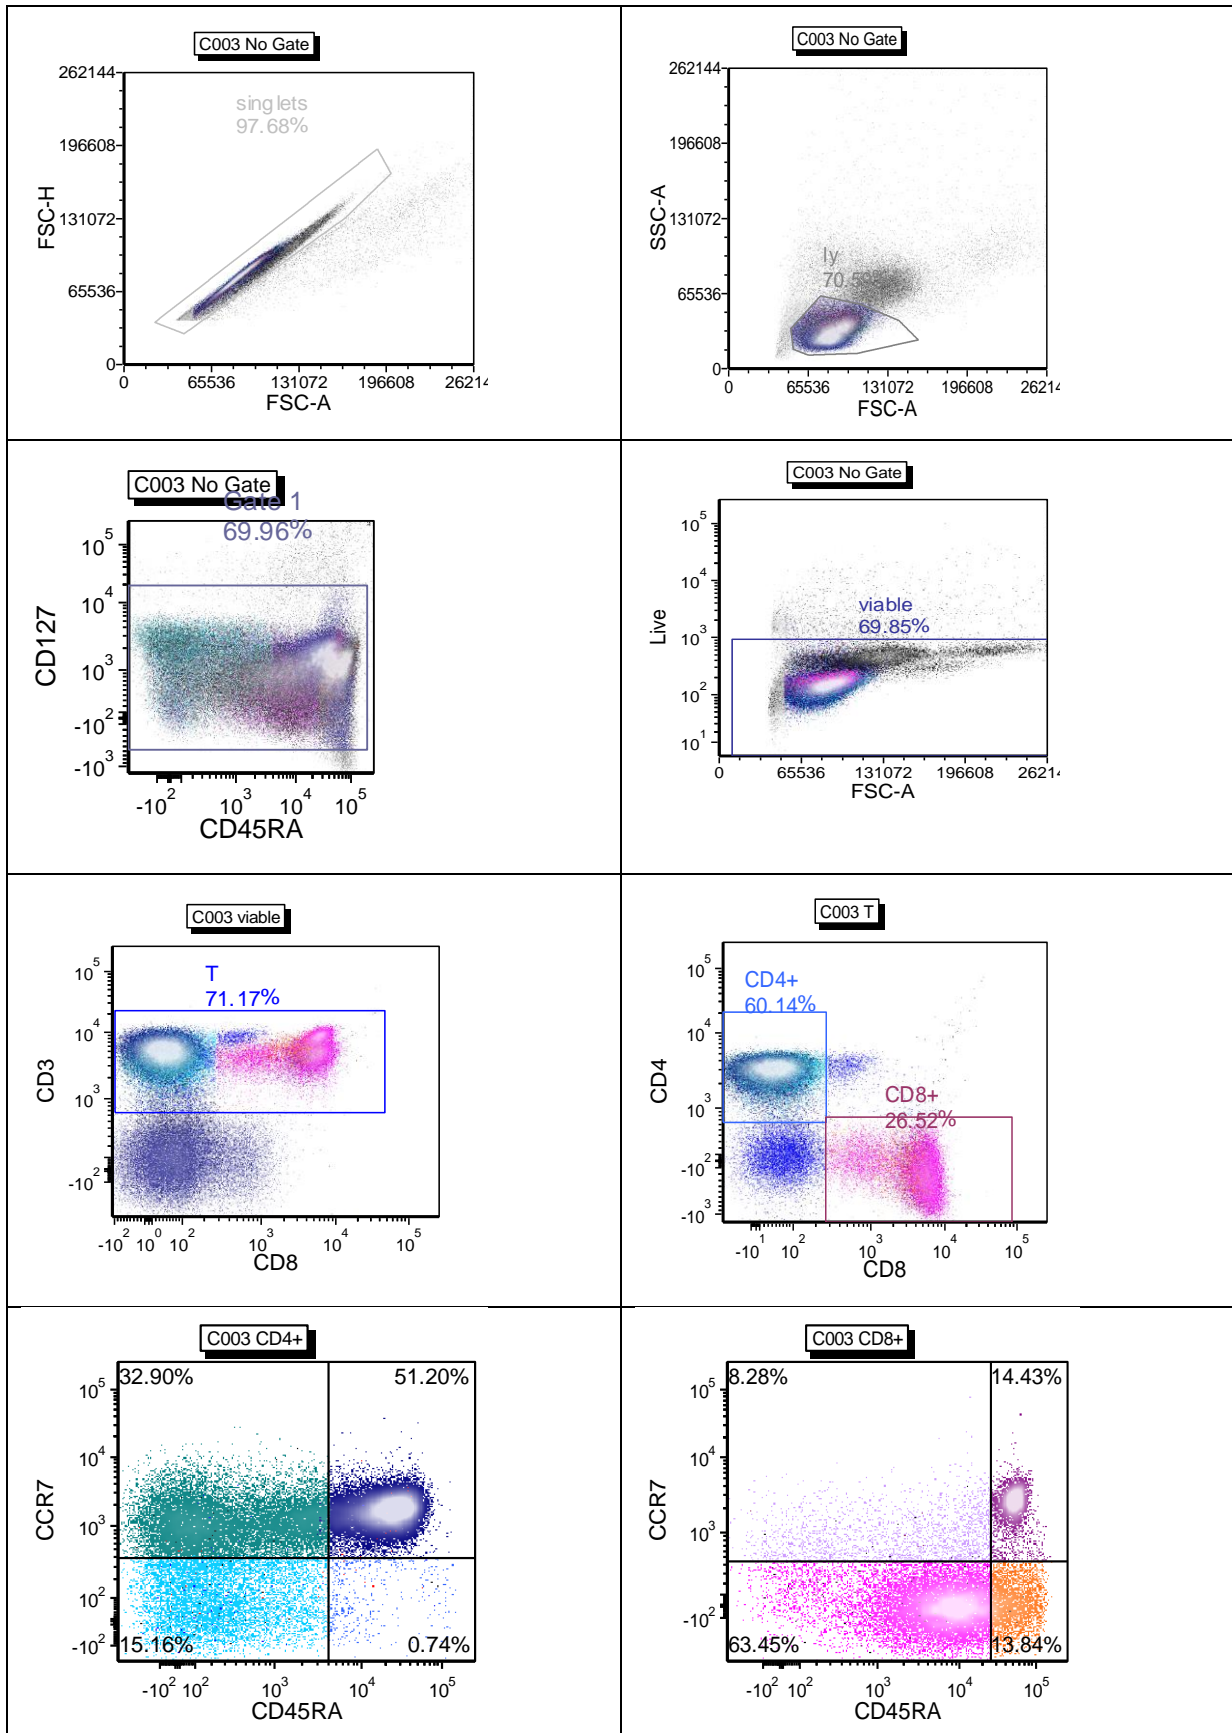

Upper left – CM, upper right – naïve,  
lower left - EM, lower right - T<sub>EMRA</sub>

Upper left – CM, upper right – naïve,  
lower left - EM, lower right - T<sub>EMRA</sub>

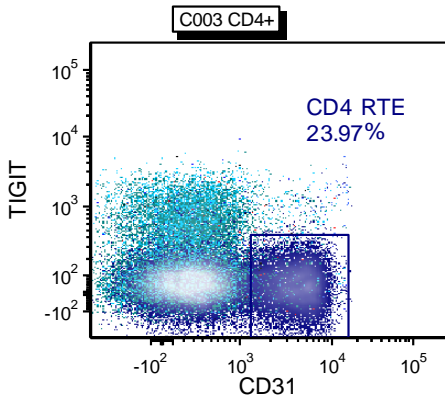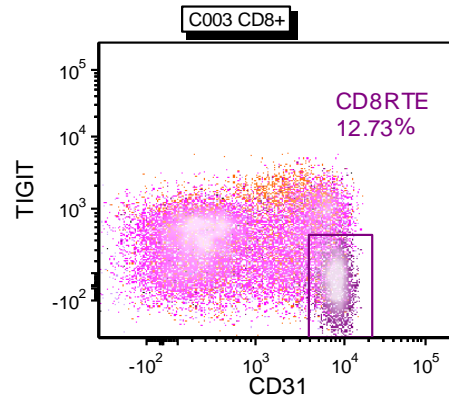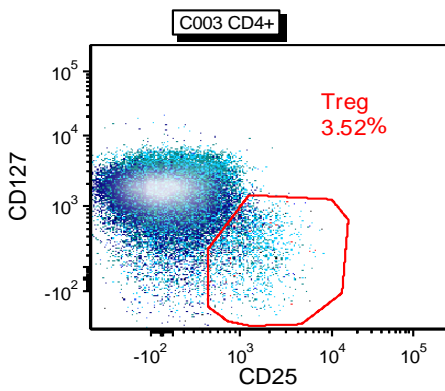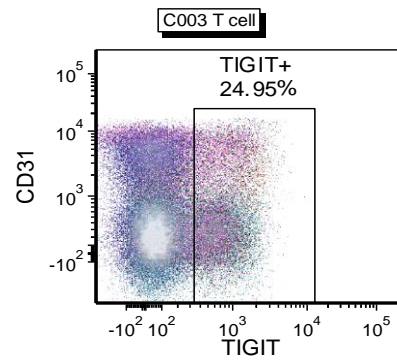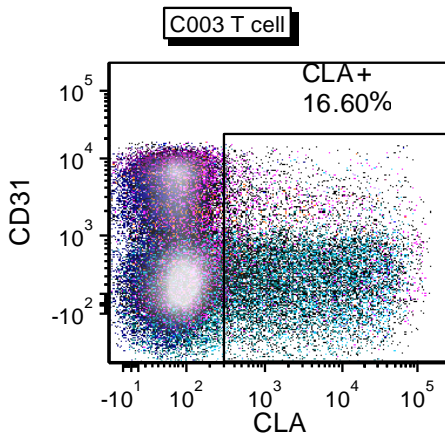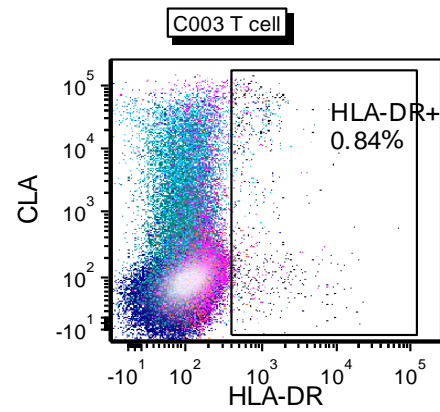

Supplement: 41598_2017_7975_MOESM1_ESM.pdf [file 41598_2017_7975_MOESM1_ESM.pdf]
